# Supplementary material for: Cofactor Engineering for Efficient Production of α-Farnesene by Rational Modification of NADPH and ATP Regeneration Pathway in Pichia pastoris
Source: MDPI journal article supplement (doi:10.3390/ijms24021767), 2023-01-16
Supplement: s1 [file s1]

## **Supplementary materials**

**Cofactor engineering for efficient production of  $\alpha$ -farnesene by rational modification of NADPH and ATP regeneration pathway in *Pichia pastoris***

**Sheng-Ling Chen<sup>1</sup>, Ting-Shan Liu<sup>1</sup>, Han-Guang Li<sup>2,\*</sup>, Wei-Guo Zhang<sup>1</sup>, Jian-Zhong Xu<sup>1,\*</sup>**

## Supplementary\_data\_1:

### Plasmid construction process

Ligation of fragments and vectors using the ClonExpress II One Step Cloning Kit (Vazyme Biotech, Nanjing, China). The fragments of homologous recombination include homologous fragments of 15-20 bp. The constructed plasmid was amplified using *E. coli* JM109. sgRNA design using <http://chopchop.cbu.uib.no/> website.

### Construction of strains

The gene integration and insertion of *Pichia pastoris* engineering strains were carried out by electroporation, and Cre/LoxP system was used for the recovery of screening resistance, in which the gene expressing Cre enzyme used an episomal plasmid, and antibiotic-free culture was used to eliminate the plasmid. The homologous fragment used for knockout and insertion in the CRISPR/CAS9 system is about 1000 bp.

## Supplementary\_data\_2:

Table S1 Primers used for expression vectors in this study

| Primers named | Primers (5'-3')                                             |
|---------------|-------------------------------------------------------------|
| PGAP-Z-F      | TATGCTATACGAACGGTAATCATGTAATTAGTTATGTCACG                   |
| PGAP-Z-R      | GGATCCGCACAAACGAAGGTCTCACTTAATCTTCTGTACTC                   |
| Lox71-F       | TACCGTTCGTATAATGTATGCTATACGAAGTTATGGATCCCCACACACCA<br>TAG   |
| Lox66-R       | TACCGTTCGTATAGCATACATTATACGAAGTTATATTAAGGGTTCTCGAGA<br>GCTC |
| HIS4-F        | CTTCGTTTGTGCGGATCCTTAAATAAGTCCCAGTTTCTC                     |
| HIS4-R        | CATACATTATACGAACGGTAATGACATTTCCCTTGCTACC                    |
| PIS1-F        | GTCATGCATGAGATCAGATCGTAACGAGGCTAAAAGTTTTTGC                 |
| PIS1-R        | GAATTCCTCGTTTTCGAATGCAGGTGGACTATCTAGAGACAAG                 |
| PGPM1-F       | TCATGCATGAGATCAGATC AAGGTTTATCTGACTGTTGCGCAC                |
| PGPM1-R       | GAATTCCTCGTTTTCGATGTTTGTGTTGTGTAATTGAAAGTT                  |
| PMET3-F       | TCATGCATGAGATCAGATCAATTCAGGCAACAGGACC                       |
| PMET3-R       | GAATTCCTCGTTTTCGATTCTTTCTGAGTTGGTTTCC                       |
| PPGK1-F       | TCATGCATGAGATCAGATCTACCCAGCCGATCACGCCTGC                    |
| PPGK1-R       | GAATTCCTCGTTTTCGAGGGCCCAAGTTGGTACCCAGCC                     |
| ZWF1-F        | TCGAAACGAGGAATTCATGACCGATACGAAAGCCG                         |
| ZWF1-R        | GGCCGCCGCGGCTCGAGTTACATCTTGTGCAGCACATC                      |
| sol3-F        | TCGAAACGAGGAATTCATGGTACAAATCTATTCCT                         |
| sol3-R        | CGGCCGCCGCGGCTCGAGTCAGTATTTCGAAGTAGAAAC                     |
| Gnd2-F        | TCGAAACGAGGAATTCATGGTTGAAGCAACAGGAG                         |

|         |                                          |
|---------|------------------------------------------|
| Gnd2-R  | GGCCGCCGCGGCTCGAGTTAAGCATCGTAGGTACTGG    |
| Rpel-F  | TCGAAACGAGGAATTCATGGTTAAACCTATTATTGC     |
| Rpel-R  | GGCCGCCGCGGCTCGAGTCATAAGTTGGGTTTTGGTTTG  |
| cPOS5-F | TCGAAACGAGGAATTCATGTTTGTGAGGGTTAAATTG    |
| cPOS5-R | GGCCGCCGCGGCTCGAG TTAATCATTATCAGTCTGTCTC |
| APRT-F  | TCGAAACGAGGAATTCATGTCAACCGCTTCTCTG       |
| APRT-R  | GGCCGCCGCGGCTCGAGTCATTCTGCTGCCCCGA       |
| PGI-sg  | TGTTCACTTCGTATCCAACG                     |
| GPD1-sg | GTTGACGGATATTATCAACG                     |
